# Supplementary material for: Fluorinated Zr-MOF-modified separators for Li–S batteries with enhanced electrochemical performance
Source: Royal Society of Chemistry journal article supplement (doi:10.1039/d5nr03256c), 2025-12-10
Supplement: d5nr03256c1.pdf [file d5nr03256c1.pdf]

## Supporting Information

### Fluorinated Zr-MOF Modified Separators for Li-S Batteries with Enhanced Electrochemical Performances

Yang-Jie Wang<sup>#,a</sup>, Lei Cao<sup>#,b</sup>, Hai-Xin Li<sup>a</sup>, Bao-Qun Wang<sup>b</sup>, Jin-Shan Xiong<sup>a</sup>, Jun-Jie Zhang<sup>a</sup>, Jin-Liang Zhuang<sup>\*,a</sup>, Xuan Du<sup>\*,b</sup>, Wei Zhao<sup>\*,b</sup>

<sup>a</sup> School of Chemistry and Materials Science, Key Laboratory for Functional Materials Chemistry of Guizhou Province, Guizhou Normal University, Guiyang 550001, PR China

<sup>b</sup> Institute of Process Engineering, Chinese Academy of Sciences, Beijing 100190, China PR China. E-mail: wzhao@ipe.ac.cn

<sup>#</sup> These authors contributed equally to this work.

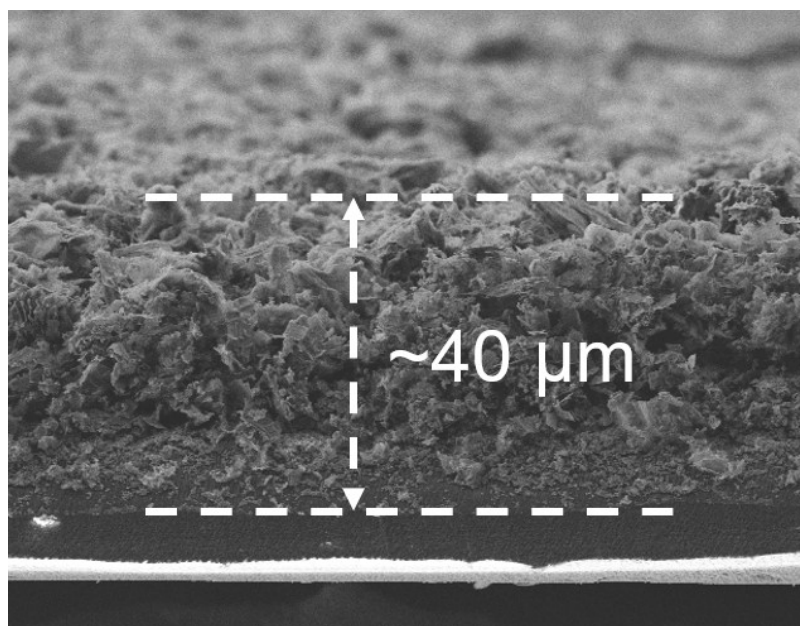

Fig. S1 SEM image of UiO-66-4F modified separator cross-section.

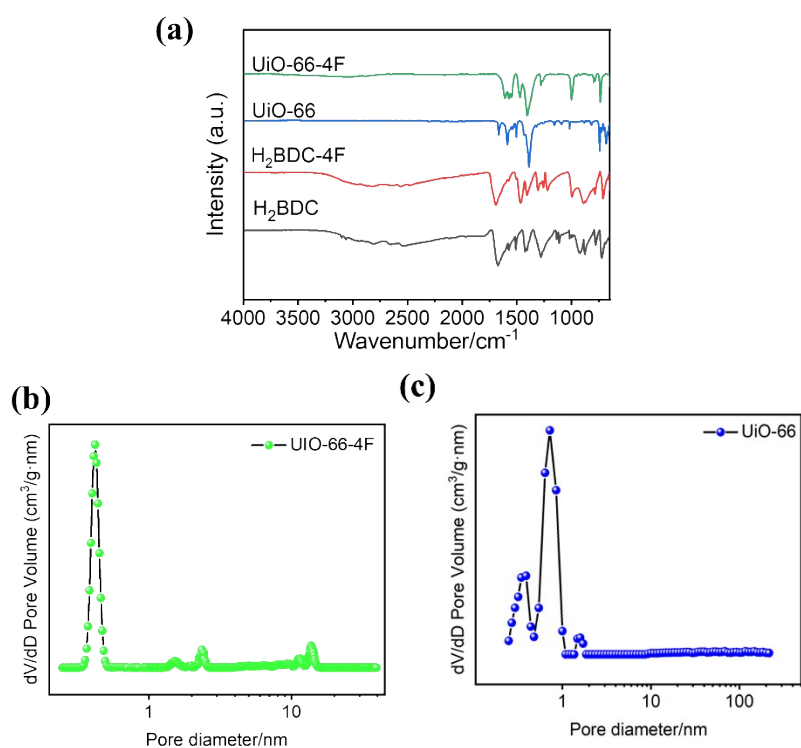

Fig. S2 (a) FTIR spectra of UiO-66-4F, UiO-66, and their corresponding ligands. (b-c) DFT calculated pore size distribution of UiO-66-4F and UiO-66.

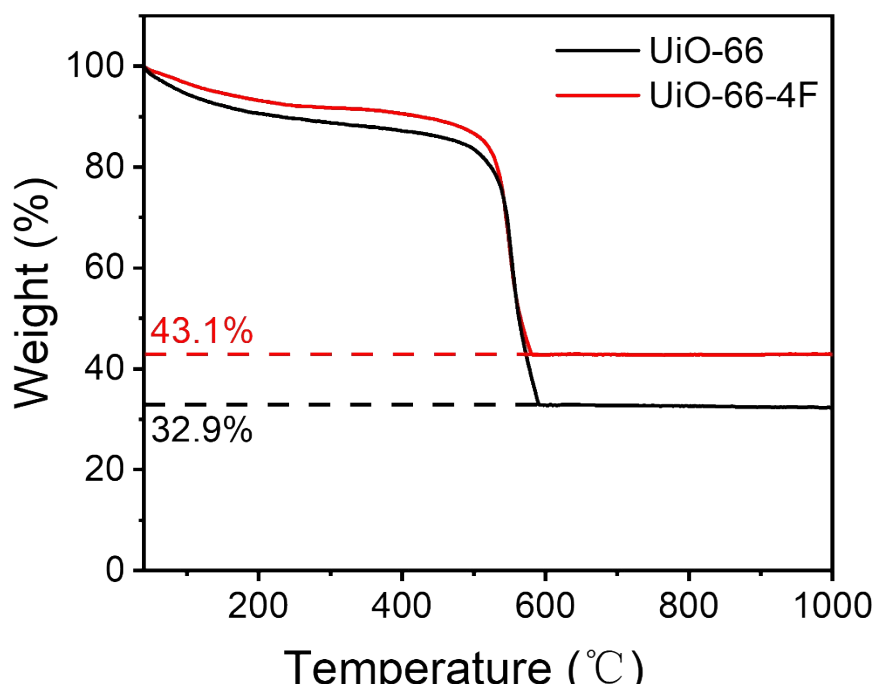

Fig. S3 TGA curves of UiO-66-4F and UiO-66 from 40 °C to 1000 °C.

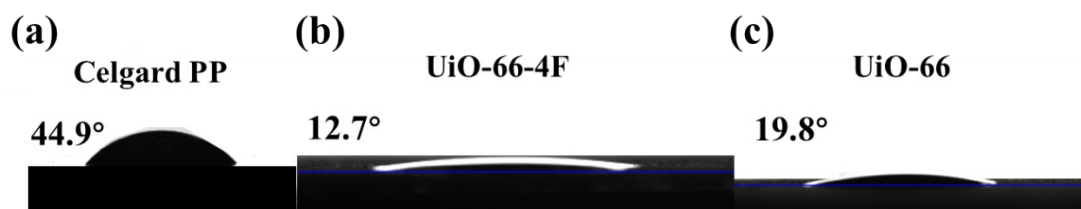

Fig. S4 Contact angle measurements of different separators with electrolytes.

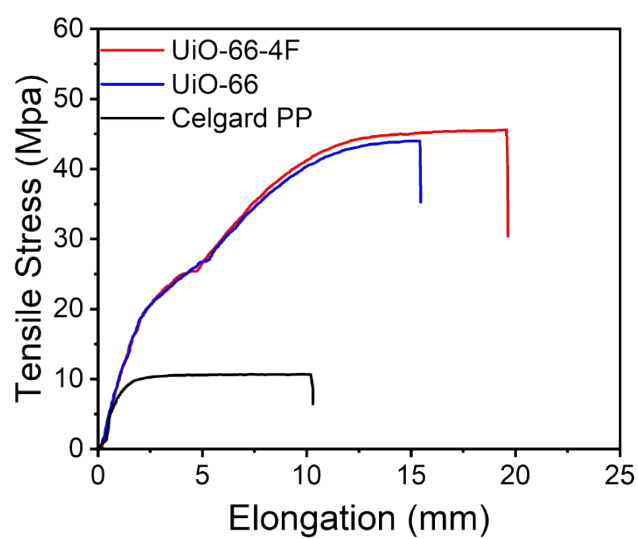

Fig. S5 Tensile-deformation curves of different separators.

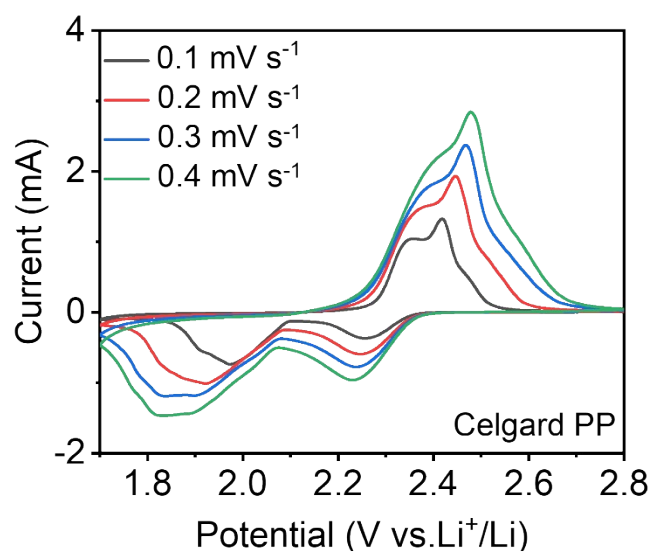

Fig. S6 CV curves of Li-S batteries with Celgard separator at scan rates of 0.1, 0.2, 0.3, 0.4 mV s<sup>-1</sup>.

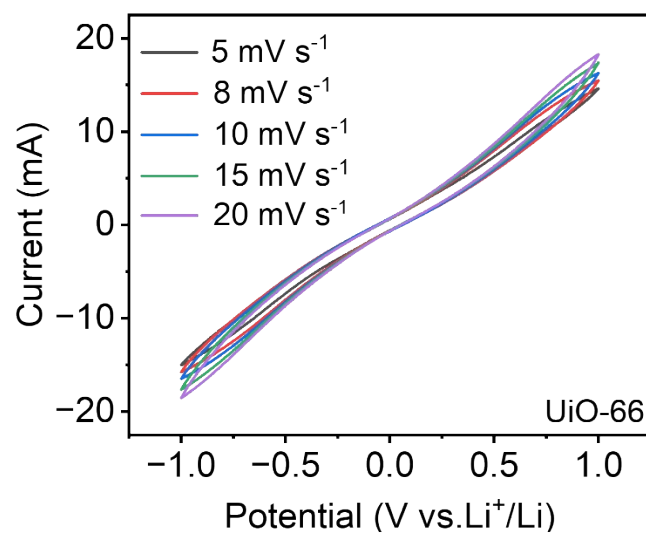

Fig. S7 CV curves of UiO-66 modified separator symmetric cells at different scan rates.

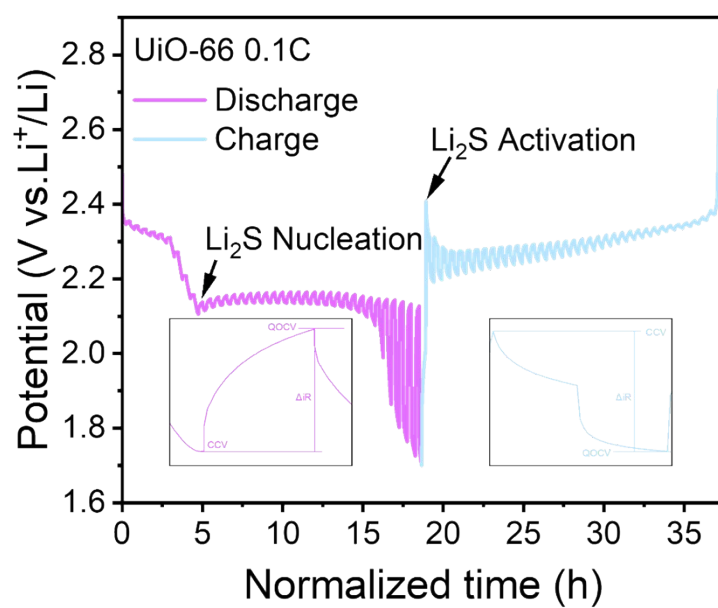

Fig. S8 GITT voltage curves of UiO-66 modified separator batteries at 0.1 C.

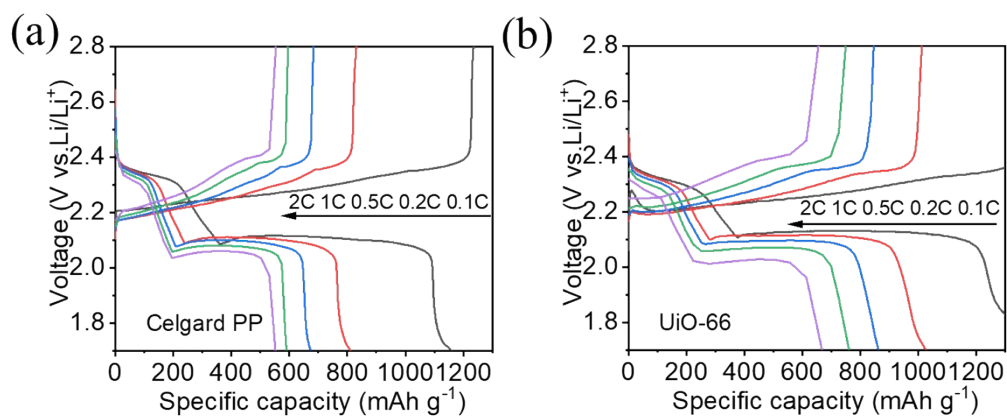

Fig. S9 GCD curves of Celgard PP separator and UiO-66 modified separators batteries at different rates.

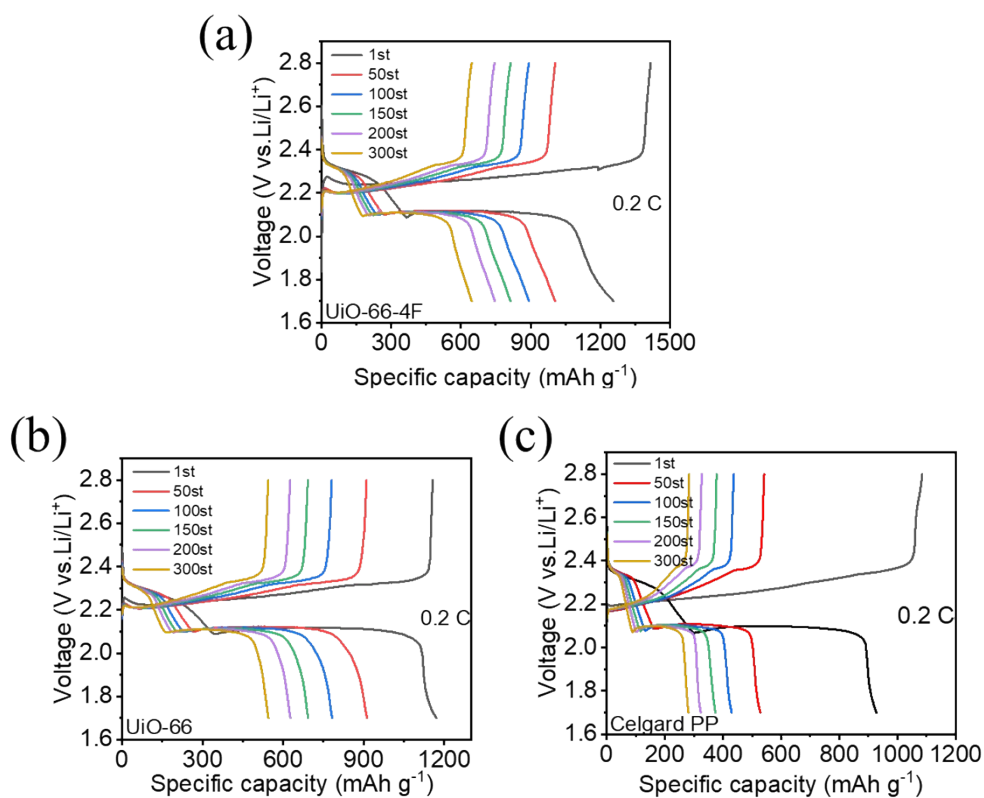

Fig. S10 Charge-discharge curves of different separator batteries at different cycles at 0.2 C.

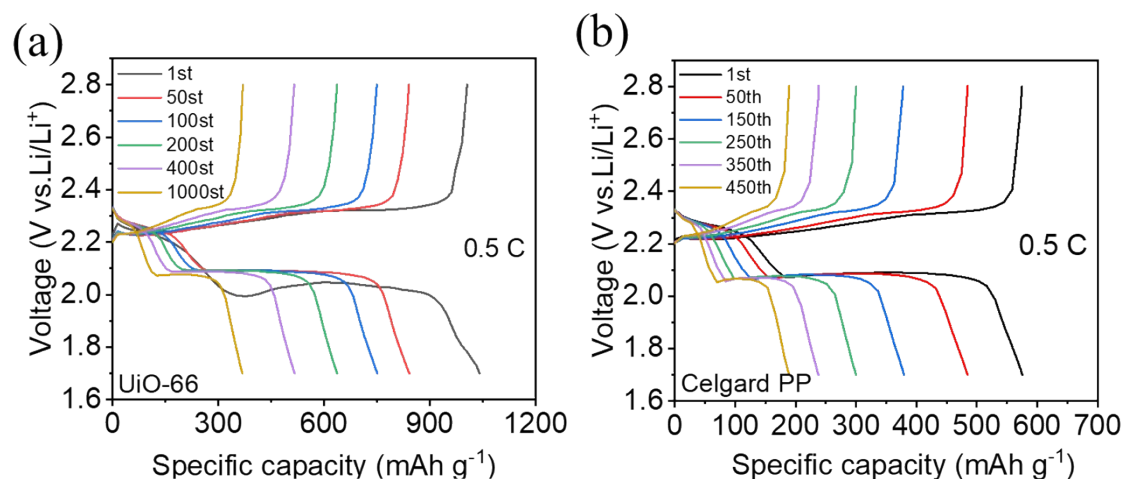

Fig. S11 Charge-discharge curves of different separator batteries at different cycles at 0.5 C.

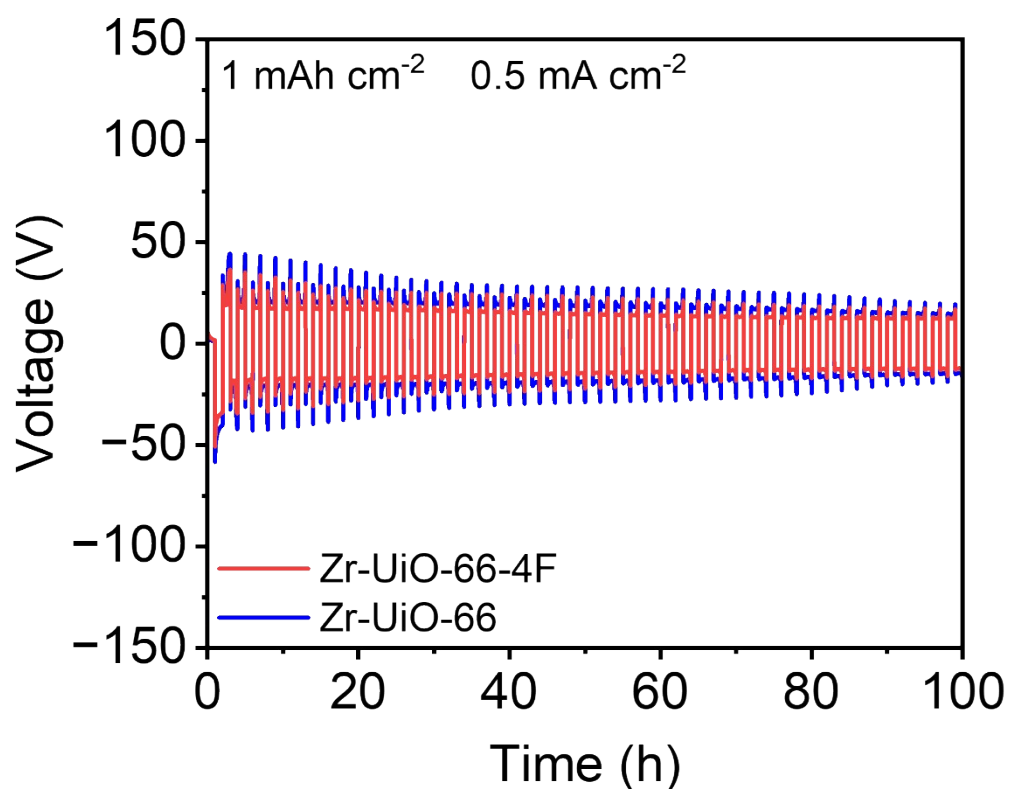

Fig. S12 Voltage profiles of UiO-66-4F and UiO-66 modified separators Li//Li symmetric batteries with a capacity of 1 mAh cm<sup>-2</sup> at 0.5 mA cm<sup>-2</sup>.

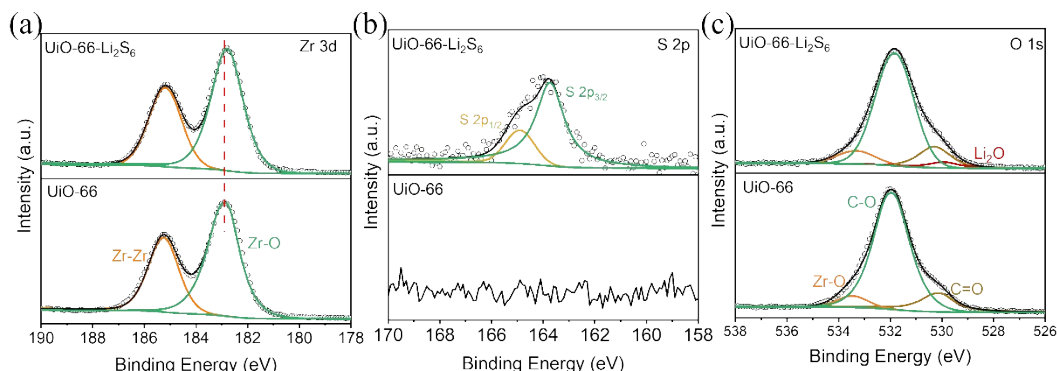

Fig. S13 High resolution XPS spectra of (a) Zr 3d, (b) S 2p, (c) O 1s, and (d) F 1s before and after cycling of UiO-66 modified separator battery at 0.5 C.

**Table S1.** The atomic composition of UiO-66 and UiO-66-4F.

|                  | C (%) | N (%) | O (%) | F (%) | Zr (%) |
|------------------|-------|-------|-------|-------|--------|
| <b>UiO-66-4F</b> | 64.64 | 0.54  | 21.88 | 10.88 | 2.06   |
| <b>UiO-66</b>    | 61.68 | 0.37  | 32.10 | 0     | 5.84   |

## 1. Computational Methods

All density functional theory (DFT) calculations were performed to investigate the interactions between the MOF structures and lithium polysulfides. The computational model, comprising two Zr-oxo nodes connected by one bdc<sup>2-</sup> linker, was extracted from the crystalline structure of UiO-66 (CCDC: 889529). The unit cell of UiO-66-4F was constructed by modifying the pristine UiO-66 model, followed by full geometric optimization using DFT. For the Brillouin zone integration, gamma-centered meshes with a 2×2×1 k-point grid were employed in reciprocal space.
